# Supplementary material for: Oxidative Stress in the Pathophysiology of Kidney Disease: Implications for Noninvasive Monitoring and Identification of Biomarkers
Source: Hindawi journal article supplement (doi:10.1155/2020/5478708), 2020-01-28

# Graphical Abstract

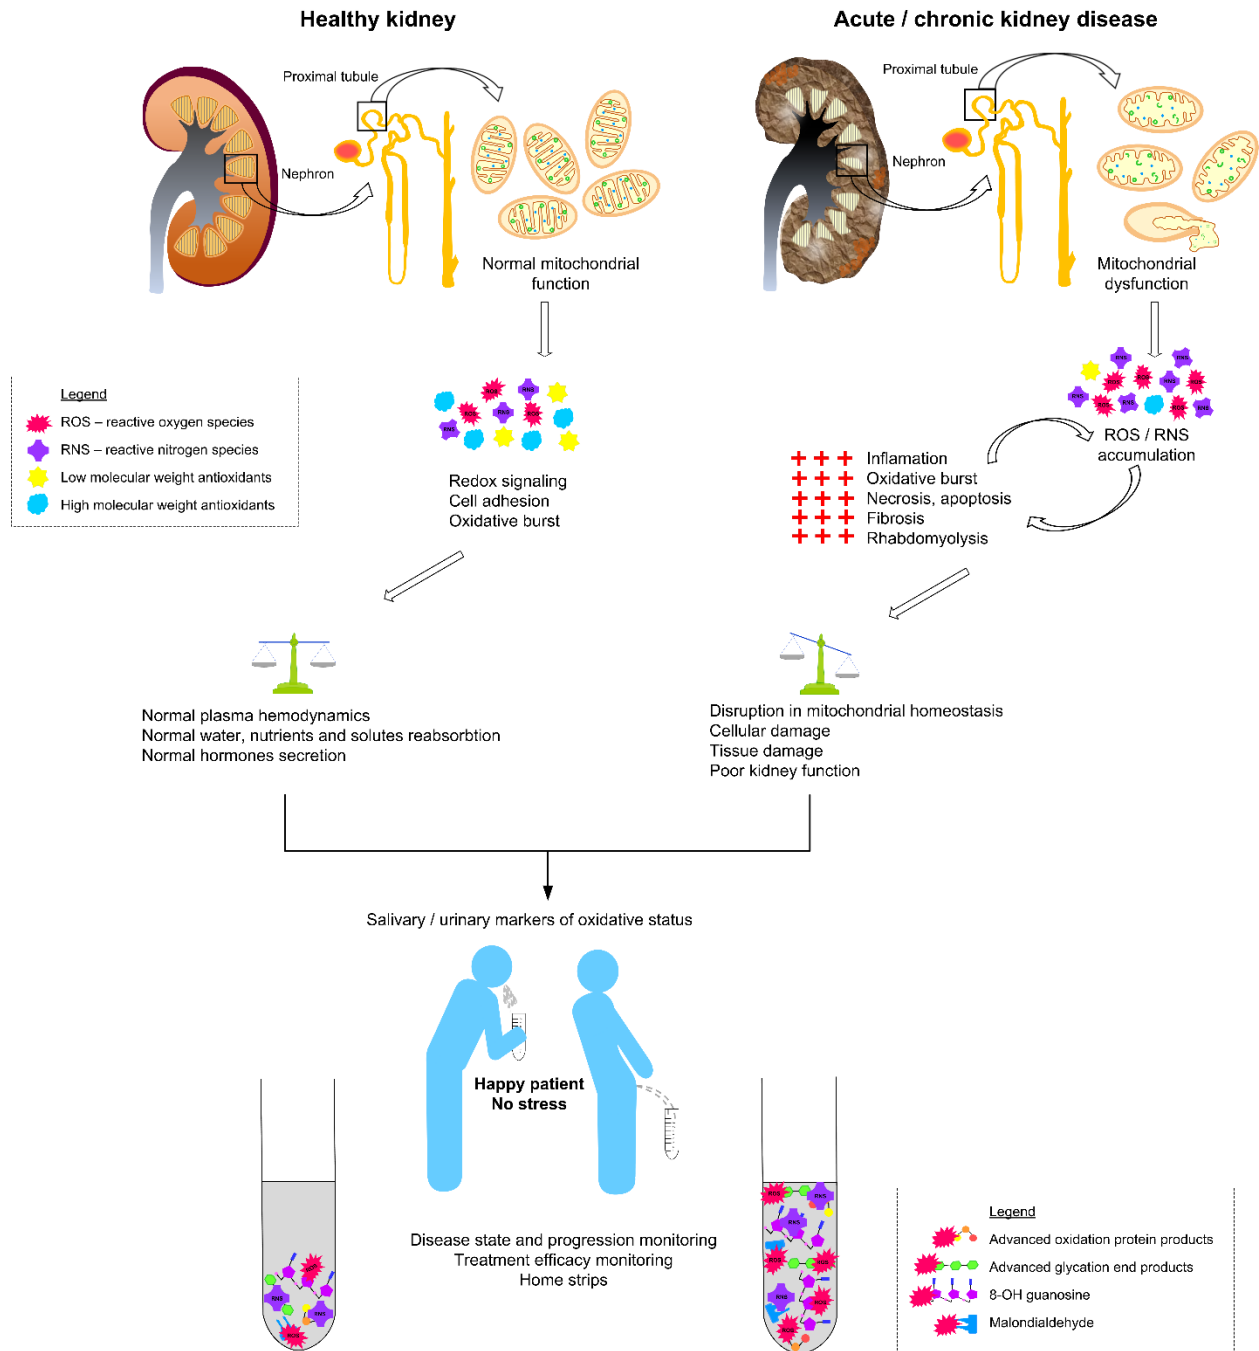

Supplement: f1 [file 5478708.f1.pdf]
